# Supplementary material for: Fabrication and design equation of film-type large-scale interdigitated supercapacitor chips
Source: Royal Society of Chemistry journal article supplement (doi:10.1039/c2nr31961f), 2012-01-01
Supplement: c2nr31961f.pdf [file c2nr31961f.pdf]

## Supporting Information

# Fabrication and design equation of film-type large-scale interdigitated supercapacitor chips

**Inho Nam, Gil-Pyo Kim, Soomin Park, Junsu Park, Nam Dong Kim and Jongheop Yi**

*World Class University Program of Chemical Convergence for Energy & Environment,  
School of Chemical and Biological Engineering, Institute of Chemical Processes,  
Seoul National University,  
Seoul 151-742, Republic of Korea.*

*Fax: +82 2 888 0708; Tel: +82 2 880 7438;*

*E-mail: [jyi@snu.ac.kr](mailto:jyi@snu.ac.kr)*

## Experimental Details

A large-scale interdigitated supercapacitor chip based on a hierarchical MnO<sub>2</sub> structure was generated on a silicon wafer. The surface of the silicon wafer was wet oxidized to produce a silicon oxide layer (SHF-150, Seltron) and a positive photoresist layer was subsequently spin coated and developed on the oxidized layer using a photomask (MA-6, Karl-suss). A Cr layer and Pt layer were sequentially thermally evaporated onto the same layer as the adhesion layer and a supercapacitor current collector was applied (ALPS-C03, alpha plus). The hierarchical MnO<sub>2</sub> structure was electrodeposited on the surface of the Pt layer. For electrodeposition, the wafer was immersed in aqueous solutions of Mn(NO<sub>3</sub>)<sub>2</sub> (0.02 M) and NaNO<sub>3</sub> (0.1 M) (WPG100, Wonatech).<sup>15</sup> The wafer was used as the working electrode, and a Pt electrode was used as the counter electrode, Ag/AgCl electrode used as the reference electrode, and a constant current of 100 μA/cm<sup>2</sup> was applied (15 – 120 min deposition time). After lifting off the photoresist with acetone followed by an overnight drying in a vacuum oven at 80 °C, a large-scale interdigitated patterned hierarchical MnO<sub>2</sub> structure was finally produced. For the full cell supercapacitor chip without an external electrolyte, a cover slip was attached to the fabricated supercapacitor chip and a 2 M Li<sub>2</sub>SO<sub>4</sub> electrolyte solution was injected into the chip using microfluidics. Scanning electron microscopy images of the microelectrodes of the interdigitated supercapacitor chip were obtained using a field-emission scanning electron microscope (AURIGA, Carl Zeiss) and cyclic voltammograms of the interdigitated supercapacitor chips at various sweep-rates (10 mV – 5,000 mV) and a potential window of 0 V – 0.8V were analyzed (Iviumstat, Ivium).

## Supplementary Figures

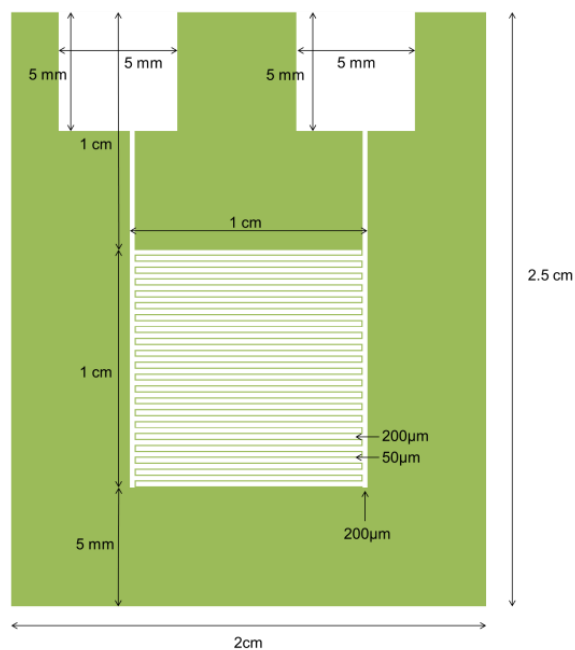

**Fig. S1.** Pattern design and linear dimensions of large-scale interdigitated supercapacitor chip with 40 interdigital electrodes. Each microelectrode was 200 μm in width and 1 cm in length. The electrodes were interspaced by 50 μm. Occupied area of the interdigital electrodes was 1 cm × 1 cm. This area can be increased up to the area limit of the electrochemical deposition method (size of counter electrode).

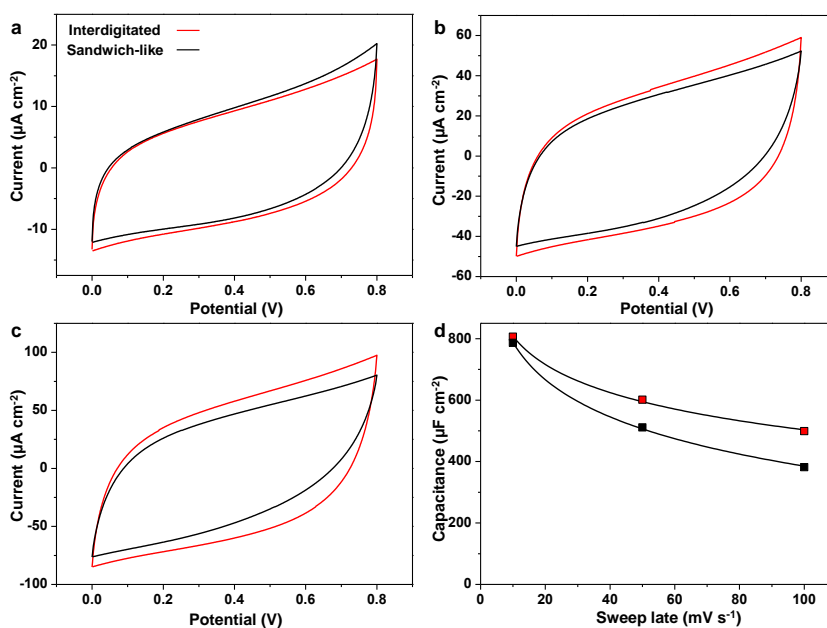

**Fig. S2.** (a), (b), (c), Cyclic voltammograms (CV) for large-scale interdigitated-supercapacitor chips and conventional sandwich type supercapacitors based on a hierarchical MnO<sub>2</sub> structure (60 min deposition time). Sweep rates were 10 mV s<sup>-1</sup> (a), 50 mV s<sup>-1</sup> (b), and 100 mV s<sup>-1</sup> (c). (d) Capacitance versus sweep-rate for large-scale interdigitated supercapacitor chip and conventional sandwich-type supercapacitor based on a hierarchical MnO<sub>2</sub> structure. The electrolyte was a 2 M Li<sub>2</sub>SO<sub>4</sub> solution at room temperature.

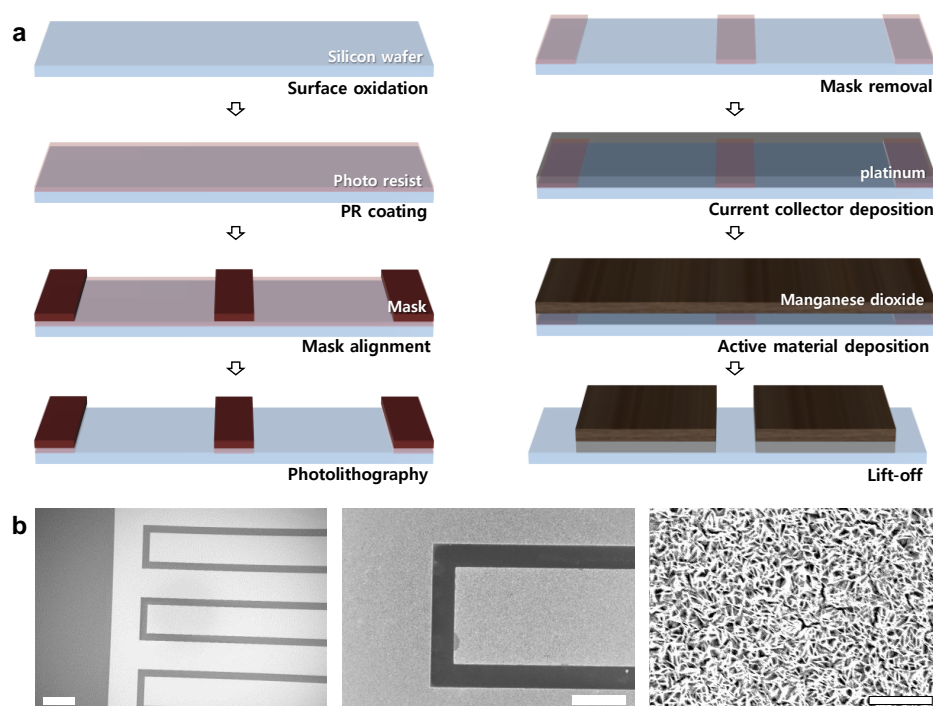

**Fig. S3.** (a) Details of the procedure used to fabricate a large-scale interdigitated supercapacitor chip based on a hierarchical MnO<sub>2</sub> structure microelectrode. (b) SEM images of the interdigitated patterned microelectrode based on a hierarchical MnO<sub>2</sub> structure (120 min deposition time) (scale bar : 200 μm, 100 μm and 5 μm).

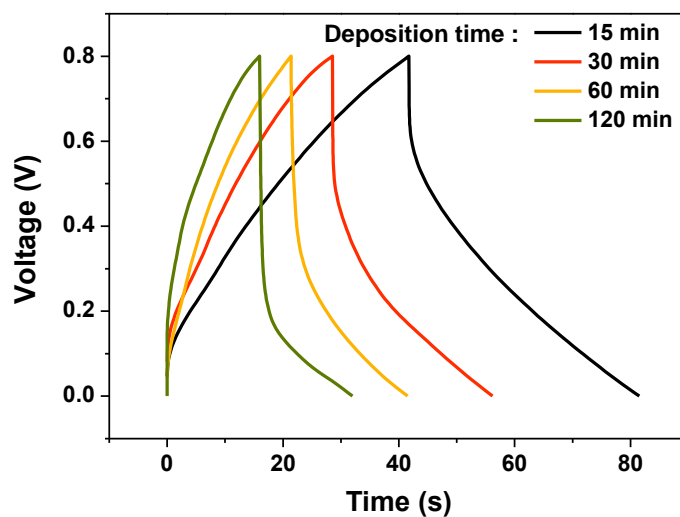

**Fig. S4.** Galvanostatic charge-discharge (voltage versus time) curves at four different deposition times. The deposition times for MnO<sub>2</sub> were 15 min, 30 min, 60 min, and 120 min, respectively. The current density was 40 μA per deposition time (h).

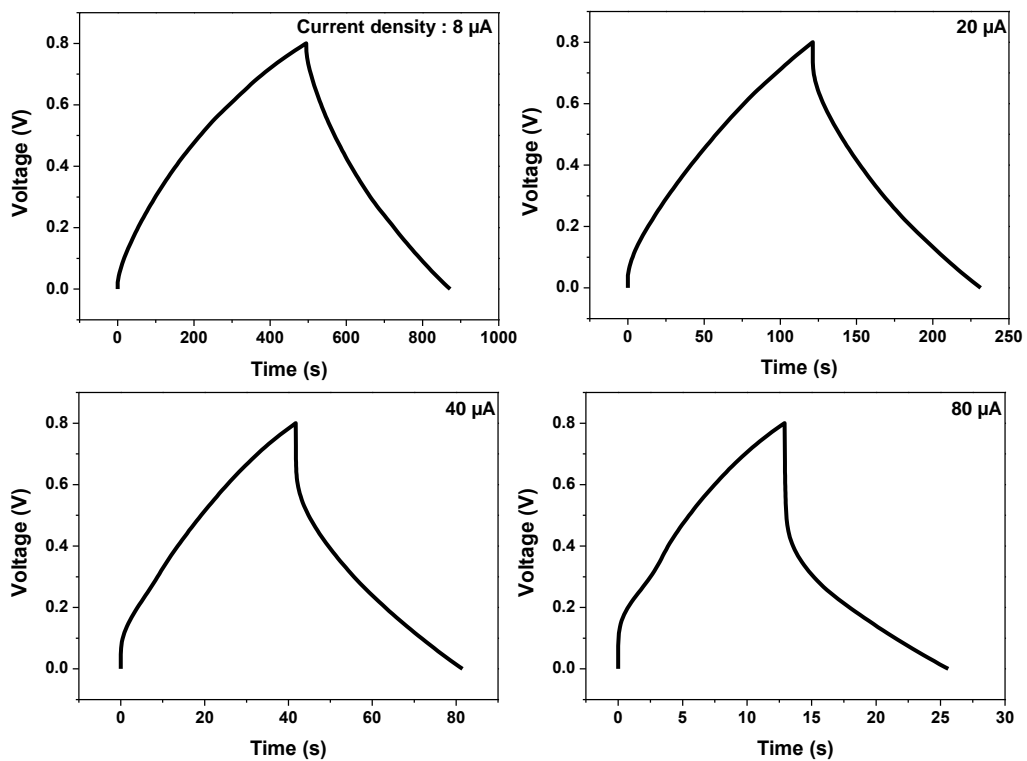

**Fig. S5.** Galvanostatic charge-discharge (voltage versus time) curves at four different current densities. The deposition time of MnO<sub>2</sub> was 15 min. The current densities were 8  $\mu\text{A}$ , 20  $\mu\text{A}$ , 40  $\mu\text{A}$ , and 80  $\mu\text{A}$  per deposition time (h), respectively.

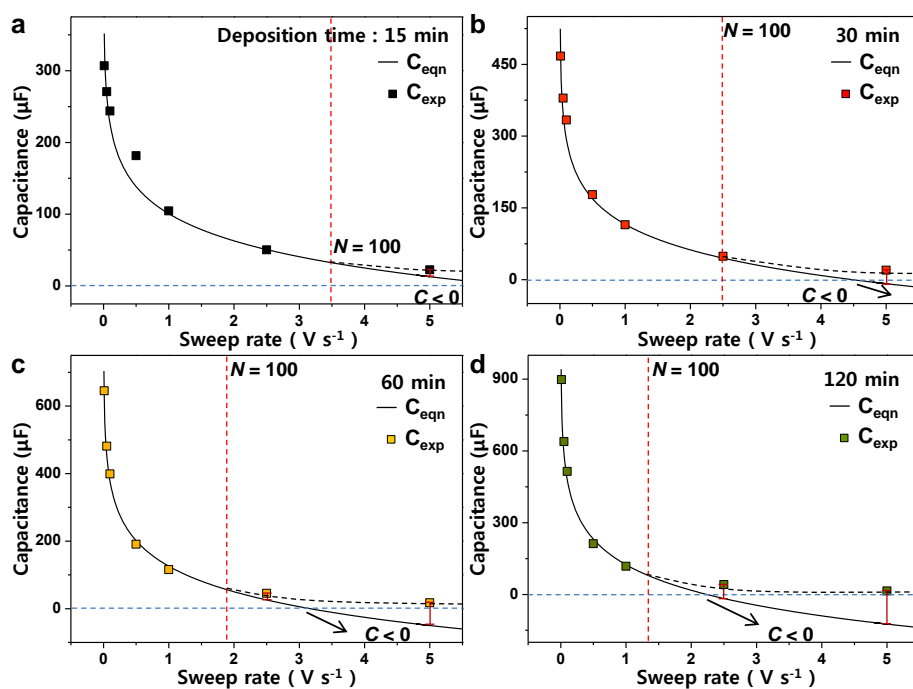

**Fig. S6.** Capacitance versus sweep-rate at the four different deposition times for correlation between calculated capacitance ( $C_{\text{eqn}}$ , line) and experimental capacitance ( $C_{\text{exp}}$ , point).  $C_{\text{eqn}}$  was estimated according to  $C = -At^{1/2}\ln(Bvt^{1/2})$ , where  $A = 1.82 \times 10^{-6} \text{ F s}^{-1}$  and  $B = 5.26 \times 10^{-3} \text{ V}$  and  $C_{\text{exp}}$  at seven different sweep-rates between 10 and 5,000  $\text{mV s}^{-1}$  and four different deposition times. The deposition times used were 15 min (a), 30 min (b), 60 min (c) and 120 min (d).

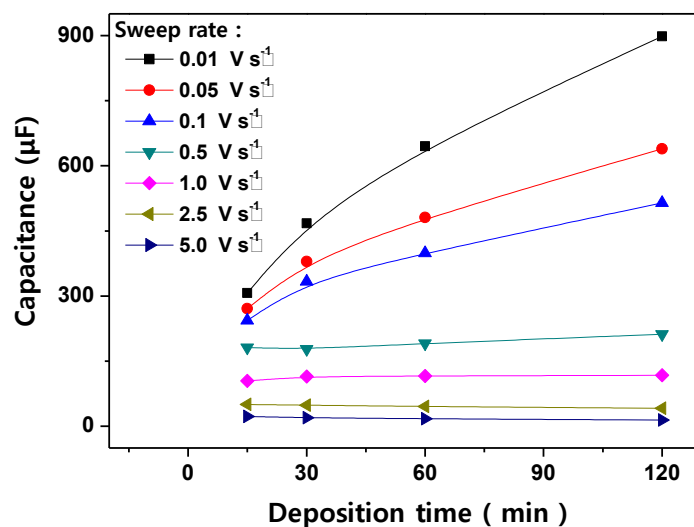

**Fig. S7.** Capacitance versus deposition time at seven different sweep rates. The sweep rates were 10 mV s<sup>-1</sup>, 50 mV s<sup>-1</sup>, 100 mV s<sup>-1</sup>, 500 mV s<sup>-1</sup>, 1,000 mV s<sup>-1</sup>, 2,500 mV s<sup>-1</sup>, and 5,000 mV s<sup>-1</sup>.

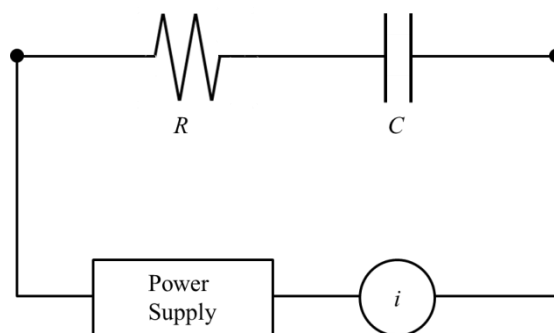

**Fig. S8.** Basic RC circuit for linear potential sweep method of supercapacitor system where  $R$  is resistance of equivalent circuit and  $C$  is capacitance. In this basic RC circuit,  $E = E_R + E_C = iR + q/C$  where  $E$  is potential,  $q$  is electrical charge. In linear potential sweep method,  $E = vt$  where  $v$  is sweep rate and  $t$  is discharge time, therefore these equations can be combined to  $vt = R(dq/dt) + q/C$ . In conclusion, if current attains a steady-state,  $i = vC$  as is in equation (3) in the main text.<sup>31</sup>



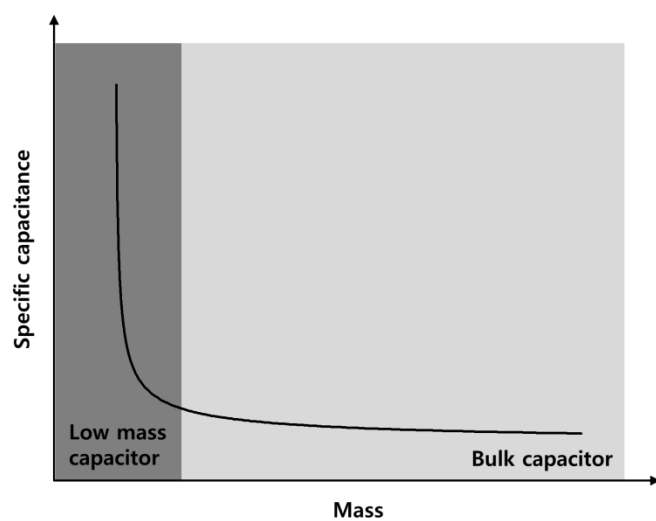

**Fig. S9.** Plot for specific capacitance versus mass calculated according to equation (10),

$C_{sp} = -A'm^{-1/2} \ln(B'vm^{1/2})$ . The sweep rate was assumed to be constant.
